# 1 **A common representation of time across visual and** 2 **auditory modalities**

3 **Louise C. Barne<sup>1</sup>, João R. Sato<sup>1</sup>, Raphael Y. de Camargo<sup>1</sup>, Peter M. E. Claessens<sup>1</sup>,**  
4 **Marcelo S. Caetano<sup>1</sup>, and André M. Cravo<sup>1</sup>**

5 <sup>1</sup>Centro de Matemática, Computação e Cognição, Universidade Federal do ABC (UFABC), São Bernardo do  
6 Campo - SP – Brasil

## 7 **Corresponding author**

8 André M. Cravo

9 Centro de Matemática Computação e Cognição

10 Universidade Federal do ABC

11 Rua Arcturus, 03. Bairro Jardim Antares. São Bernardo do Campo - SP - Brasil. CEP 09606-070.

12 E-mail: [andre.cravo@ufabc.edu.br](mailto:andre.cravo@ufabc.edu.br)

13 **Abbreviated title:** A common representation of time across modalities

14 **Author contributions statement:** L.C.B., M.S.C, P.M.E.C and A.M.C. conceived the experiment. L.C.B. performed the  
15 experiments. All authors analysed the data, wrote and reviewed the manuscript.

## 16 **Abstract**

17 Humans' and non-human animals' ability to process time on the scale of milliseconds and seconds is essential for adaptive  
18 behaviour. A central question of how brains keep track of time is how specific temporal information across different sensory  
19 modalities is. In the present study, we show that encoding of temporal intervals in auditory and visual modalities are qualitatively  
20 similar. Human participants were instructed to reproduce intervals in the range from 750 ms to 1500 ms marked by auditory or  
21 visual stimuli. Our behavioural results suggest that, although participants were more accurate in reproducing intervals marked  
22 by auditory stimuli, there was a strong correlation in performance between modalities. Using multivariate pattern analysis in  
23 scalp EEG, we show that activity during late periods of the intervals was similar within and between modalities. Critically, we  
24 show that a multivariate pattern classifier was able to accurately predict the elapsed interval, even when trained on an interval  
25 marked by a stimulus of a different sensory modality. Taken together, our results suggest that, while there are differences in the  
26 processing of intervals marked by auditory and visual stimuli, they also share a common neural representation.

27 **Keywords:** time perception, multivariate pattern analysis, EEG, vision, audition

## 28 Introduction

29 The ability to estimate time is essential for humans and non-human animals to interact with their environment (Buhusi  
30 and Meck, 2005; Mauk and Buonomano, 2004; Merchant et al., 2013a). Intervals in the range of hundreds of milliseconds to  
31 seconds are critical for sensory and motor processing, learning, and cognition (Buhusi and Meck, 2005; Mauk and Buonomano,  
32 2004; Merchant et al., 2013a). However, the mechanisms underlying temporal processing in this range are still largely discussed.  
33 A central unanswered question is whether temporal processing depends on dedicated or intrinsic circuits (Ivry and Schlerf,  
34 2008). Dedicated models propose that temporal perception depends on central specialised mechanisms, as an internal clock,  
35 that create a unified perception of time (Ivry and Schlerf, 2008). This class of models can account for behavioural findings such  
36 as correlations in performance for some temporal tasks (Keele et al., 1985) and the observation that learning to discriminate a  
37 temporal interval in one sensory modality can sometimes be transferred to other modalities (Buetti and Buonomano, 2014).

38 Intrinsic models of time propose that a variety of neural circuits distributed across the brain are capable of temporal  
39 processing. One of the most known examples is the state-dependent network - SDN (Mauk and Buonomano, 2004). Within this  
40 framework, neural circuits can take advantage of the natural temporal evolution of its states to keep track of time (Mauk and  
41 Buonomano, 2004). One of the main advantages of such models is that they can explain the known differences of temporal  
42 processing across sensory modalities (van Wassenhove, 2009) and that learning a specific interval does not commonly improve  
43 temporal performance in other intervals (Buetti and Buonomano, 2014).

44 Given that both dedicated and intrinsic views can account for some results while not explaining others, there has been an  
45 increase in interest in hybrid models, according to which local task-dependent areas interact with a higher central timing system  
46 (Merchant et al., 2013a; Wiener et al., 2011). The main advantage of hybrid models is that they can explain why performance  
47 in some timing tasks seems to be correlated across participants, while still exhibiting modality and task-related differences  
48 (Merchant et al., 2008b,a).

49 In humans, studies that investigate these different models employ a variety of methods, such as behavioural, neuroimaging  
50 and neuropharmacological manipulations, on healthy participants and neurological patients (Coull et al., 2011; Ivry and Schlerf,  
51 2008; Kononowicz et al., 2016; Merchant et al., 2013a; Wiener et al., 2011). Although the high temporal resolution of EEG  
52 should in principle be optimal to track neural processing during temporal tasks, the contribution of these methods has been  
53 controversial. One of the main difficulties is the absence of a clear electrophysiological correlate of temporal processing (for a  
54 recent review see (Kononowicz et al., 2016)). This lack of electrophysiological markers makes it hard to judge, for example,  
55 whether temporal processing in different modalities share a common representation (N'Diaye et al., 2004).

56 In a recent study, we have shown that multivariate pattern analysis (MVPA) can reveal spatiotemporal dynamics of brain  
57 activity related to temporal processing (Bueno et al., 2017). Multivariate approaches can take advantage of small differences in  
58 the signal across electrodes that might not be detectable using classical EEG methods. These pattern recognition methods allow  
59 the assessment of whether brain states evoked by different tasks, stimuli and sensory modalities are qualitatively similar.

60 In the present study, we investigated whether encoding of temporal intervals in different sensory modalities is qualitatively

61 similar. Our behavioural results suggest that, although participants are more accurate in reproducing intervals marked by  
62 auditory stimuli, there is a strong correlation over observers in performance between modalities. Critically, we show that a  
63 multivariate pattern classifier based on EEG activity can predict the elapsed interval, even when trained on an interval marked by  
64 a different sensory modality. Taken together, our results suggest that, while there are differences in the processing of intervals  
65 marked by auditory and visual stimuli, they also share a common neural representation.

## 66 **Materials & Methods**

### 67 **Participants**

68 Twenty volunteers (age range, 18-30 years; 11 female) gave informed consent to participate in this study. All of them had  
69 normal or corrected-to-normal vision and were free from psychological or neurological diseases. The experimental protocol was  
70 approved by The Research Ethics Committee of the Federal University of ABC. All experiments were performed in accordance  
71 with the approved guidelines and regulations.

### 72 **Experimental Design**

73 The experiment consisted of a temporal reproduction task. The stimuli were presented using the Psychtoolbox v.3.0 package  
74 (Brainard, 1997) on a 20-inch CRT monitor with a vertical refresh rate of 60 Hz, placed 50 cm in front of the participant.

75 Each trial started with a fixation point that participants fixated throughout the trial. After a delay (1.5 s), two flashes or tones  
76 were presented, separated by a sample interval (measured between tone or flash onsets). After a random delay (1.5 to 2.5 s),  
77 volunteers were re-exposed to the same interval. After another random delay (1.5 to 2.5 s), a ready stimulus was presented to  
78 the participant, indicating the beginning of the reproduction task 1. Volunteers had to reproduce the exposed interval, initiated  
79 by the ready stimulus (RS) and ended by a stimulus caused by a button press (R1).

80 In auditory blocks, the tones consisted of 1000 Hz tones (100 ms duration), while the ready and end stimuli consisted of  
81 500 Hz tones. In visual blocks, the flashes that marked the interval consisted of yellow 0.5 degrees of visual angle discs (100  
82 ms duration), while the ready and end stimuli consisted of magenta flashes of the same size. No direct feedback was given.

83 The sample intervals ranged between 750 ms and 1500 ms and were uniformly distributed. Each block (visual or auditory)  
84 consisted of 120 trials. Half of the participants performed the visual block first, while the other half performed the auditory  
85 block first.

### 86 **Behavioural analysis**

87 Events in which intervals were reproduced as longer than double the sample interval or shorter than half the sample  
88 interval were considered errors and excluded from further analyses. The proportion of errors was low for both modalities  
89 (auditory:  $0.0042 \pm 0.0011$ ; maximum proportion of rejected trials per participant= 0.0167; visual:  $0.0092 \pm 0.0031$ ; maximum  
90 proportion of rejected trials per participant= 0.0583)



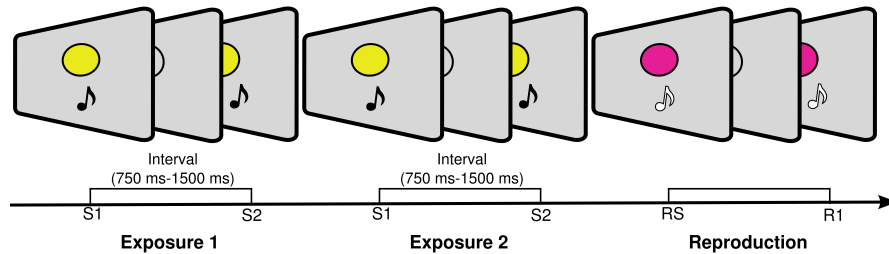

**Figure 1.** Temporal reproduction task. (A) Sequence of events during a trial. Each trial consisted of two equal empty intervals (between 750 ms and 1500 ms), marked by two stimuli. In auditory blocks, the interval was marked by two brief tones (1000 Hz, 100 ms), while in visual blocks the interval was marked by two flashes (0.5 degrees of visual angle, 100 ms). Participants were instructed to reproduce the interval at the end of each trial.

91 Similarly to previous studies (Cicchini et al., 2012; Jazayeri and Shadlen, 2010), the total error in the reproduction task was  
 92 partitioned into two components: the average bias (BIAS) and the average variance (VAR). These two metrics are directly  
 93 related to the overall mean squared error (MSE). To calculate these components, sample intervals were first binned into six  
 94 equally sized bins and, for each bin, an estimate of both measures were calculated. The BIAS for each bin was calculated as  
 95 the average difference between the reproduced interval and the sample intervals. The VAR for each bin was calculated as the  
 96 variance of the difference between reproduced and real intervals. The final estimate of the BIAS was calculated as the root  
 97 mean square of the BIAS across bins and of the VAR as the average VAR across bins (Jazayeri and Shadlen, 2010). For ease of  
 98 interpretation and comparison with previous studies, the VAR values were plotted using its square root  $\sqrt{\text{VAR}}$ .

99 We further calculated a regression index (RI) to index the tendency of reproduced intervals to regress towards the mean  
 100 sample. This index was calculated as the difference in slope between the best linear fit on the reproduced interval and perfect  
 101 performance (Cicchini et al., 2012). This measure varies from 0 (perfect performance) to 1 (complete regression to the  
 102 mean, after allowing for a constant bias). The same linear fit between real and reproduced intervals was used to calculate the  
 103 indifference points for both modalities. This point refers to the physical interval where durations are reproduced veridically.

104 To analyse the scalar property of time, we computed the slope of the generalised Weber function (García-Garibay et al.,  
 105 2016; Getty, 1975; Ivry and Hazeltine, 1995). A linear regression between the variance of the reproduced intervals and the  
 106 mean subjective duration squared was performed as follows:

$$\sigma^2 = k^2 T^2 + \sigma_{indep}^2 \quad (1)$$

107 where  $k$  is the slope that approximates the Weber fraction and  $\sigma_{indep}^2$  is a constant representing the time-independent  
 108 component of the variability. To account for the systematic bias found in the reproduced intervals, we used an approach similar  
 109 to García-Garibay et al. (2016) in which  $T^2$  was computed based on the linear fit between real and reproduced intervals.

110 All measures were calculated separately for each participant and condition (auditory and visual). At the group level,

111 comparisons between the calculated parameters were done using paired t-tests (two-sided). To investigate correlations across  
112 participants for all three measures, Pearson correlations were calculated between the values of each measure in visual and  
113 auditory conditions.

## 114 **EEG recordings and pre-processing**

115 EEG was recorded continuously from 64 ActiCap Electrodes (Brain Products) at 1000 Hz by a QuickAmp amplifier (Brain  
116 Products). All sites were referenced to FCz and grounded to AFz. The electrodes were positioned according to the International  
117 10-10 system. Additional bipolar electrodes registered the electrooculogram (EOG).

118 EEG pre-processing was carried out using BrainVision Analyzer (Brain Products). All data were down-sampled to 250 Hz  
119 and re-referenced to the average activity across electrodes. For eye movement artefact rejection, an independent component  
120 analysis (ICA) was performed on filtered (Butterworth Zero Phase Filter between 0.05 Hz to 30 Hz) and segmented (-200  
121 ms to 2000 ms relative to S1) data. For the ICA, epochs were baselined based on the average activity of the entire trial. Eye  
122 related components were identified by comparing individual ICA components with EOG channels and by visual inspection.  
123 The average proportion of rejected trials for each participant corresponded to 0.0613. For all further analyses, epochs were  
124 baseline corrected based on the period between -200 ms to 0 ms relative to S1 presentation.

## 125 **Multivariate pattern analysis - MVPA**

### 126 ***Similarity between different trials and modalities***

127 To calculate the similarity across trials we used a bootstrap approach. For each participant and comparison of interest, data  
128 from all intervals that lasted at least 1.125 seconds were divided into two groups of trials and averaged across trials per group  
129 (Bueno et al., 2017). Then, for each time point, data from each split (two-row vectors with the averaged amplitude values of all  
130 62 electrodes) were compared using a Pearson correlation. This procedure was repeated 5000 times for each participant and  
131 Fisher transformed coefficients were averaged across permutations for each participant and comparison of interest.

132 At the group level, EEG-analyses were implemented non-parametrically (Maris and Oostenveld, 2007; Wolff et al., 2015)  
133 with sign-permutation tests. For each time-point, the Fisher transformed coefficients for a random half of the participants  
134 were multiplied by  $-1$ . The resulting distribution was used to calculate the p-value of the null-hypothesis that the mean value  
135 was equal to 0. Cluster-based permutation tests were then used to correct for multiple comparisons across time using 5000  
136 permutations, with a cluster-forming threshold of  $p < 0.05$  (Maris and Oostenveld, 2007). The sum of the values within a  
137 cluster was used as the cluster-level statistic. The significance threshold was set at  $p < 0.05$ ; all tests were one-sided.

### 138 ***Decoding the elapsed interval***

139 To investigate whether information about the elapsed interval could be decoded from activity across electrodes, we used a  
140 Naive Bayes classifier to perform a multiclass classification (Grootswagers et al., 2017). For all classifications, activity from  
141 the last 125 ms of the elapsed interval (-125 ms to 0 relative to S2) was averaged for each electrode. Data for each exposure (E1  
142 and E2) were analysed separately. Intervals were divided into six equally sized bins (125 ms each).

### 143 ***Within modality classification***

144 The pre-processing and decoding procedures followed standard guidelines (Grootswagers et al., 2017; Lemm et al., 2011).  
145 A leave-one-out method was used, although similar results were obtained when using a 10-fold cross-validation. For each  
146 test trial, data from all other trials were used as the training set. A principal component analysis (PCA) was used to reduce  
147 the dimensionality of the data (Grootswagers et al., 2017). The PCA transformation was computed on the training data and  
148 the components that accounted for 99% of the variance were retained. The estimated coefficients from the training data were  
149 applied to the test data. On average, the number of components used was of  $37.17 \pm 1.43$  (mean  $\pm$  s.e.m., maximum number of  
150 components=47, minimum number of components=17).

151 Decoding performance was summarised with Cohen's quadratic weighted kappa coefficient (Cohen, 1968). The weighted  
152 kappa gives more weight to disagreements for categories that are further apart. It assumes values from -1 to 1, with 1 indicating  
153 perfect agreement between predicted and decoded label and 0 indicating chance (Cohen, 1968).

### 154 ***Between modalities classification***

155 The between modality decoding (training the classifier on data from one modality and testing on the other) followed a  
156 similar structure as the within-modality decoding. Given that participants performed the first half of the experiment with one  
157 modality and the second with the other, the effects of non-stationarity are low (Lemm et al., 2011). Thus, data from all trials of  
158 one modality were used as the training set and tested against all trials of the other modality.

### 159 ***Correlation of decoding and behaviour***

160 Similarly to our previous decoding analysis, activity from the last 125 ms of the elapsed interval (-125 ms to 0 relative to  
161 S2) was used. For each test trial, a Naive Bayes classifier was trained on trials that were shorter (at least 25 ms and up to 125  
162 ms shorter) and longer (at least 25 ms and up to 125 ms longer) than that the physical duration of that given test trial. This  
163 classification was applied to all trials between 875 ms and 1375 ms, so that all trials had a similar number of training trials.

164 Based on this classification, trials were further classified into three categories: (S/S) when in both presentations (E1 and E2)  
165 the trial was classified as shorter; (S/L or L/S) when in only one of the two presentations the trial was classified as longer and  
166 (L/L) when in both presentation the trials were classified as longer.

167 To test whether classification might explain participants' performance, we first fitted, for each participant, a linear function  
168 relating the physical interval and participants' reproduced interval. The residuals from this linear fit were stored and separated  
169 as a function of the three decoding categories mentioned above. Notice that the linear fit on the behavioural results naturally  
170 takes into account participants tendency to regress towards the mean. Thus, this analysis allows isolating if trials that were  
171 encoded as shorter or longer were reproduced as shorter or longer than participants' average reproduction for that interval  
172 duration.

### 173 ***Statistical analysis***

174 All t-tests, correlations, ANOVAs and effect sizes (Cohen's d for t-tests and omega-squared for ANOVAs) were calculated

175 using JASP (JASP Team, 2017). The p-values were adjusted, whenever appropriate, for violations of the sphericity assumption  
176 using the Greenhouse–Geisser correction.

## 177 Results

### 178 Behaviour

179 Following previous studies (Cicchini et al., 2012; Jazayeri and Shadlen, 2010), temporal errors were partitioned into two  
180 components: the average difference between the reproduction times and the sample interval, henceforth called BIAS, and the  
181 corresponding variance of the difference between reproduced and sample intervals, abbreviated below as VAR. Our results  
182 showed that participants had similar BIAS for both modalities ( $BIAS_{auditory} = 0.115 \pm 0.009s$ ,  $BIAS_{visual} = 0.121 \pm 0.010s$ ,  
183 mean  $\pm$ s.e.m., paired t-test,  $t_{19} = -0.634$ ,  $p = 0.534$ ,  $d=0.142$ ). However, variance was smaller for intervals marked by auditory  
184 targets ( $\sqrt{VAR}_{auditory} = 0.148 \pm 0.010s$ ,  $\sqrt{VAR}_{visual} = 0.170 \pm 0.011s$ , paired t-test,  $t_{19} = -2.789$ ,  $p = 0.012$ ,  $d=0.624$ ).

185 As can be seen in Figure 2B, in both modalities there was a strong central tendency effect, characterised by long intervals  
186 being underestimated and short durations being overestimated (Cicchini et al., 2012; Jazayeri and Shadlen, 2010; Lejeune  
187 and Wearden, 2009; Pérez and Merchant, 2018). To measure the strength of this effect, we calculated a regression index (RI)  
188 (Cicchini et al., 2012). This index is calculated as the difference in slope between the best linear fit on the reproduced interval  
189 and perfect performance. It varies from 0 (perfect performance) to 1 (complete regression to the mean, after allowing for a  
190 constant bias). The estimated RIs suggest that participants had a stronger central tendency effect in visual blocks, as shown by  
191 higher RIs ( $RI_{auditory} = 0.346 \pm 0.036$ ,  $RI_{visual} = 0.430 \pm 0.032$ , paired t-test,  $t_{19} = -3.152$ ,  $p = 0.005$ ,  $d=0.705$ ).

192 We further calculated the indifference points for both modalities. As can be seen in Figure 2B, indifference points were  
193 shorter for auditory intervals than for visual intervals ( $IndifferencePoint_{auditory} = 0.854 \pm 0.059$ ,  $IndifferencePoint_{visual} =$   
194  $1.07 \pm 0.044$ , paired t-test,  $t_{19} = -3.648$ ,  $p = 0.002$ ,  $d=0.816$ ).

195 We used a slope analysis to analyse the scalar property of time (García-Garibay et al., 2016; Getty, 1975; Ivry and  
196 Hazeltine, 1995). A linear regression between the variance of the reproduced intervals and the mean subjective duration was  
197 used to calculate the generalised Weber function (García-Garibay et al., 2016; Getty, 1975; Ivry and Hazeltine, 1995). We  
198 found a lower slope for auditory than for visual intervals ( $k^2_{auditory} = 0.0059 \pm 0.0058$ ,  $k^2_{visual} = 0.022 \pm 0.0085$ , paired t-test,  
199  $t_{19} = -2.082$ ,  $p = 0.051$ ,  $d=0.465$ )

200 Although participants were, in general, more accurate for auditorily marked compared to visually marked intervals, there was  
201 also a strong correlation in how well participants performed for both modalities, in agreement with previous findings (Merchant  
202 et al., 2008b; Stauffer et al., 2012). As shown in Figure 2B, there was a strong correlation between performance in auditory and  
203 visual blocks across participants as measured in their BIAS (Pearson product-moment correlation:  $r_{20} = 0.545$ ,  $p = 0.013$ ),  
204  $\sqrt{VAR}$  ( $r_{20} = 0.722$ ,  $p < 0.001$ ), Regression Index ( $r_{20} = 0.701$ ,  $p < 0.001$ ) and slopes ( $r_{20} = 0.475$ ,  $p = 0.034$ ). Indifference  
205 points were not significantly correlated across participants ( $r_{20} = 0.339$ ,  $p = 0.144$ ).

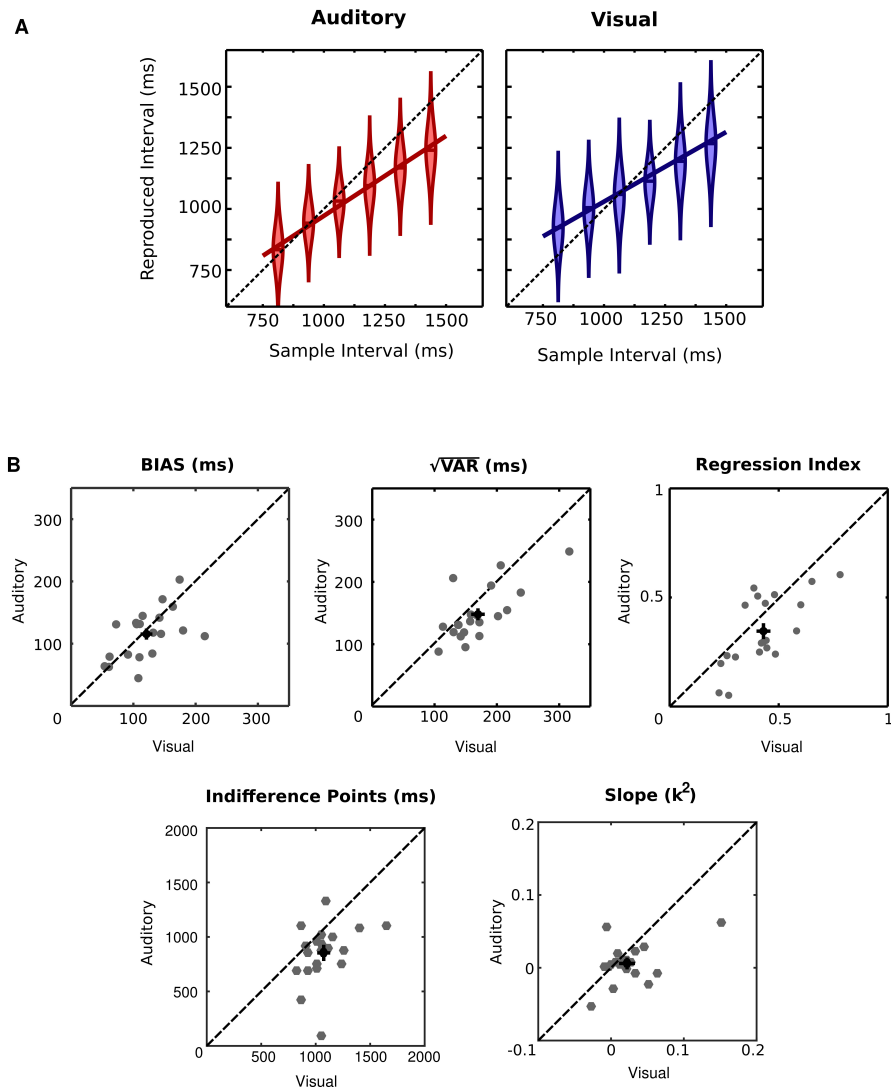

**Figure 2.** Behavioural performance (A) Average reproduction times across different intervals and conditions. Sample intervals were binned into six equally sized (125 ms) categories. Violin plots show the probability density across participants for each bin. Markers represent the median. Participants showed a central tendency effect with shorter intervals being overestimated and longer intervals being underestimated. (B) Summary statistics for performance. The BIAS (upper left panel) represents the average difference between the reproduction times and the sample interval. The VAR (upper central panel) represents the variance of the reproduced intervals. The Regression Index (upper right panel) shows the strength of the tendency to regress to the mean. The indifference points (lower left panel) represents the estimated physical interval in which participants reproduce the intervals veridically. The slope of the generalised Weber function (lower right panel) approximates the Weber fraction. Participants were, in general, better in reproducing auditory than visual intervals. There was also a correlation between visual and auditory modalities across participants for the majority of measures.

206 **EEG recordings**

207 ***Similarity of the evoked activity for intervals of similar modalities***

208 The evoked ERPs resembled classical results from temporal processing studies, with a strong contingent negative variation  
 209 (CNV) in frontocentral electrodes for both modalities (auditory/visual) and exposures (E1/E2, Figure 3). If a given pattern of  
 210 activity carries information about time, its sequence of activation must be consistent across different trials. Thus, in a first step,

211 we investigated whether the temporal pattern of EEG activity was similar in different trials within the same modality (auditory  
 212 or visual). To have a sufficient number of trials, EEG activity was epoched relative to S1 for all trials that had an interval  
 213 equal or longer than 1125 ms. These trials were then randomly divided into two groups of trials and averaged per group. The  
 214 similarity of activity across sensors for the different splits was quantified by means of a Pearson correlation coefficient. This  
 215 procedure was repeated 5000 times for each participant and Fisher transformed coefficients were averaged across permutations  
 216 for each participant.

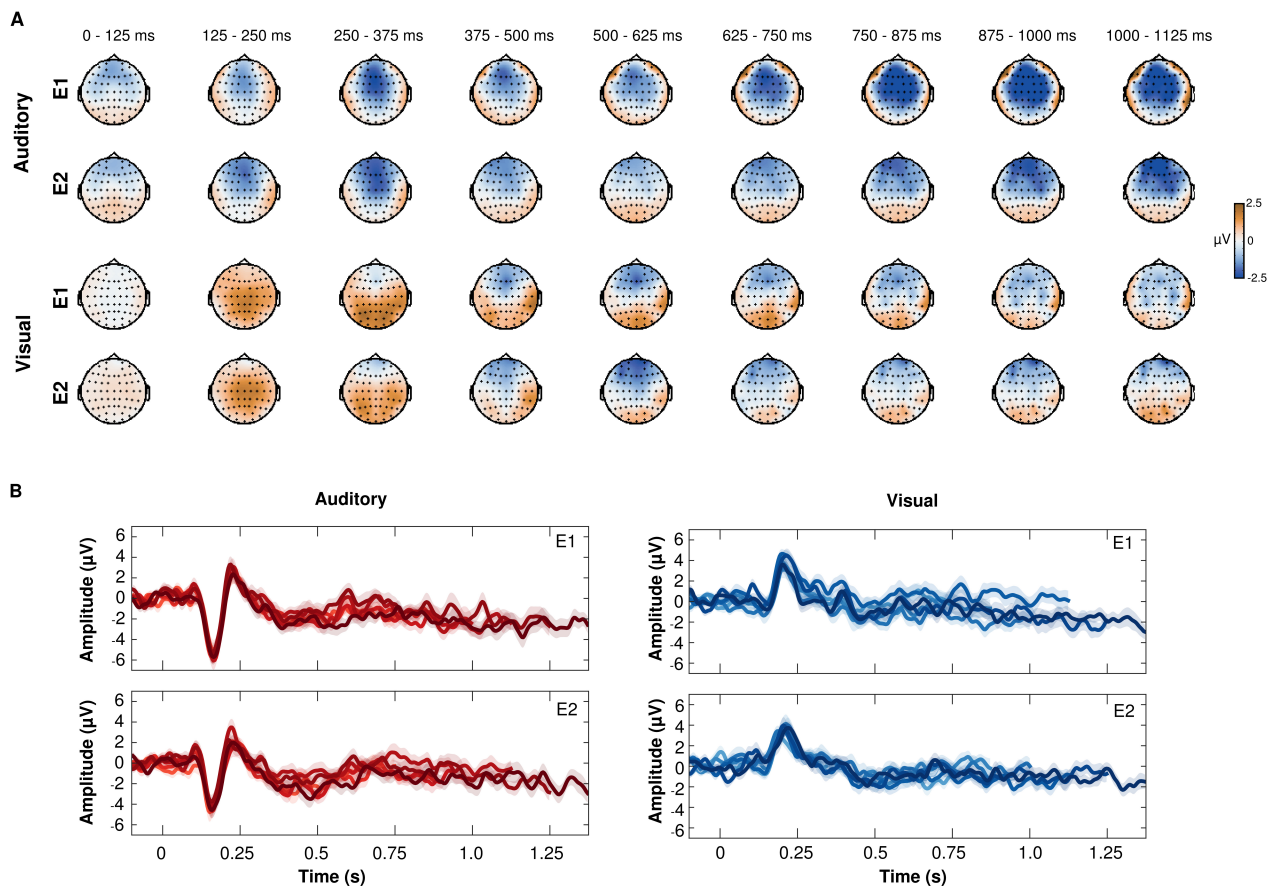

**Figure 3.** (A) Topographies for intervals longer than 1.125 seconds for both modalities and exposures. Each topography shows the average activity in 125 ms temporal bins, from 0 s to 1.125 s relative to S1 (B) Event-related potentials (mean  $\pm$  s.e.m.) in fronto-central electrodes (FC2,FCz,FC1,C1,Cz,C2) for each of the six binned tested durations (bin edges:750ms-875ms; 875ms-1000ms; 1000ms-1125ms; 1125ms-1250ms; 1250ms-1375ms and 1375ms-1500ms). Both panels show epochs segmented relative to S1, in both exposures (E1 and E2). Darker (lighter) colours represent longer (shorter) intervals.

217 As shown in Figure 4A, for trials of the same modality, there was strong similarity across trials that started shortly after the  
 218 first stimuli that marked the interval (S1). In auditory blocks, a statistically significant temporal cluster emerged 85 ms after S1  
 219 for the first exposure (E1, cluster- $p < 0.001$ ) and after 120 ms for the second (E2, cluster  $p < 0.001$ ). In both conditions, the  
 220 cluster remained throughout the interval (Figure 4A, left panel). In visual blocks, a statistically significant cluster emerged 96  
 221 ms after S1 for E1 (cluster  $p < 0.001$ ) and after 84 ms for E2 (cluster  $p < 0.001$ ). Similarly to auditory blocks, the clusters also  
 222 remained significant throughout the interval (Figure 4A, middle panel).



223 In a next step, we investigated whether similarity was modulated by sensory modality (auditory/visual) or exposure within the  
 224 trial (E1/E2). Similarity indexes over the final 400-ms period of the selected trials (725 ms to 1125 ms) were averaged for each  
 225 modality (visual/auditory) and exposure (E1/E2) and submitted to a repeated measures ANOVA (Figure 4B, left panel). There  
 226 was no significant modulation by modality ( $F_{1,19} = 0.004, p = 0.948, \omega^2 = 0$ ), exposure ( $F_{1,19} = 1.973, p = 0.176, \omega^2 = 0.044$ )  
 227 or interaction ( $F_{1,19} = 0.118, p = 0.735, \omega^2 = 0$ ).

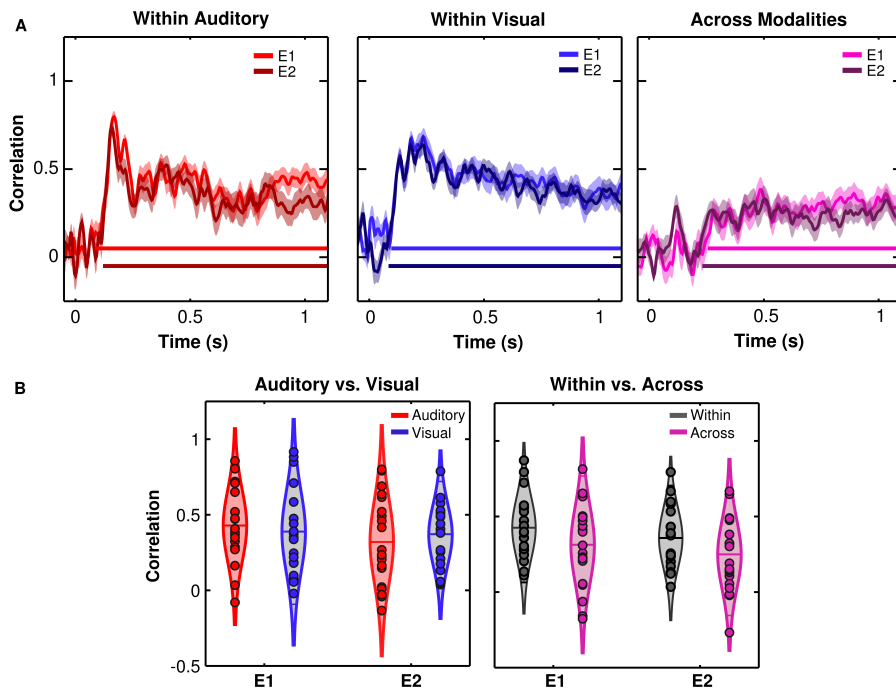

**Figure 4.** Pattern similarity across trials of same or different modalities. (A) The similarity index (mean  $\pm$  s.e.m. of estimated Pearson correlation) shows the consistency of the pattern of activity across trials within auditory blocks (left panel), visual blocks (middle panel) and across modalities (right panel). In all panels, lighter/darker lines represent similarity for the first (E1) and second exposure (E2) in each trial. Continuous lines at the bottom of each panel indicate periods of significant similarity across trials. (B) Comparison of pattern similarity for trials of the same (left panel) or different (right panel) modalities. Violin plots show the probability density across participants. Line markers represent the median and interquartile range. Circles inside the violin plots show data from all participants.

#### 228 **Similarity of the evoked activity for intervals across modalities**

229 As expected, the pattern of activity during the interval was similar for trials of the same sensory modality. However, if there  
 230 is a common representation of time across different modalities, the pattern of activity for intervals of different modalities should  
 231 also be consistent. To test this possibility, a similar analysis as described above was performed with EEG activity from intervals  
 232 marked by different modalities. Similarity across trials emerged later for these comparisons. Significant clusters emerged at  
 233 256 ms after for E1 trials (cluster  $p < 0.001$ ) and at 232 ms after S1 for E2 trials (cluster  $p < 0.001$ , Figure 2A, right panel).  
 234 Thus, although the pattern of EEG activation was similar across visual and auditory intervals, this similarity started at later  
 235 moments than for within-modality comparisons.

236 In a next step, the magnitude of the similarity when comparing trials of same and different modalities was tested. Similarity

237 indexes over the last 400 ms of the investigated intervals (725 ms to 1125 ms) were averaged for each exposure (E1/E2) and  
238 modality (within/across) and submitted to a repeated measures ANOVA (Figure 2B, right panel). Similarity for intervals of  
239 the same modality was significantly stronger than for different modalities ( $F_{1,19} = 28.443, p < 0.001, \omega^2 = .567$ ). There was  
240 no significant effect of exposure ( $F_{1,19} = 1.824, p = 0.193, \omega^2 = 0.038$ ) or of the interaction of factors ( $F_{1,19} = 0.057, p =$   
241  $0.813, \omega^2 = 0$ ).

### 242 **Decoding time from EEG signals**

243 Given the strong consistency of activity for intervals within and across modalities, we further investigated whether this  
244 pattern might carry information about the elapsed time. In a first analysis, we focused on intervals of the same sensory modality.

245 Activity from the final period of each interval (-125ms to 0 relative to S2) was binned into six equally spaced periods (bin  
246 edges: 750ms-875ms; 875ms-1000ms; 1000ms-1125ms; 1125ms-1250ms; 1250ms-1375ms and 1375ms-1500ms). A Naive  
247 Bayes classifier was used to decode from which of the six binned intervals activity from each trial came from (Gouvêa et al.,  
248 2015; Grootswagers et al., 2017). A weighted Kappa coefficient was used to quantify the agreement between decoded and real  
249 interval. This coefficient ranges from 1 (perfect agreement) to -1 (complete disagreement), where 0 indicates chance levels  
250 (Cohen, 1968).

251 As shown in Figure 5, there was a strong and statistically significant agreement between predicted and real intervals in  
252 both auditory (E1:  $Kappa_{auditory} = 0.217 \pm 0.026$ , t-test against zero,  $t_{19} = 8.480, p < 0.001, d=1.896$ ; E2:  $Kappa_{auditory} =$   
253  $0.237 \pm 0.024$ , t-test against zero,  $t_{19} = 9.887, p < 0.001, d=2.211$ ) and visual blocks (E1:  $Kappa_{visual} = 0.225 \pm 0.021$ , t-test  
254 against zero,  $t_{19} = 10.623, p < 0.001, d=2.375$ ; E2:  $Kappa_{visual} = 0.224 \pm 0.026$ , t-test against zero,  $t_{19} = 8.598, p < 0.001,$   
255  $d=1.923$ ).

256 Given that the elapsed interval could be decoded from EEG activity and that this activity was similar across different sensory  
257 modalities, we investigated whether similar decoding performance could be achieved across sensory modalities. A similar  
258 Naive Bayes classifier was used as described above. However, to test whether decoding could be generalised across sensory  
259 modalities, each test trial was classified based on the activity of intervals of the other modality.

260 Once again, there was strong agreement between predicted and real intervals, as measured by weighted Kappa coefficients.  
261 This was true when auditory intervals were decoded using visual intervals as training sets (E1:  $Kappa_{auditory} = 0.185 \pm 0.030$ ,  
262 t-test against zero,  $t_{19} = 6.137, p < 0.001, d=1.372$ ; E2:  $Kappa_{auditory} = 0.199 \pm 0.022$ , t-test against zero,  $t_{19} = 9.0627,$   
263  $p < 0.001, d=2.026$ ) as well as for when visual intervals were decoded using auditory intervals as training sets (E1:  $Kappa_{visual} =$   
264  $0.216 \pm 0.024$ , t-test against zero,  $t_{19} = 9.020, p < 0.001, d=2.017$ ; E2:  $Kappa_{visual} = 0.190 \pm 0.033$ , t-test against zero,  
265  $t_{19} = 5.800, p < 0.001, d=1.297$ ).

266 A repeated measures ANOVA was used on the estimated Kappas to test whether decoding performance depended on  
267 the modality to be predicted (auditory or visual), on the exposure (E1 or E2) and on whether it was trained on the same  
268 or different modality (within modality/across modalities). There was a trend of decoding performance being higher when  
269 trained within rather than between modalities ( $F_{1,19} = 3.502, p = .077, \omega^2 = 0.106$ ). There were no significant effects



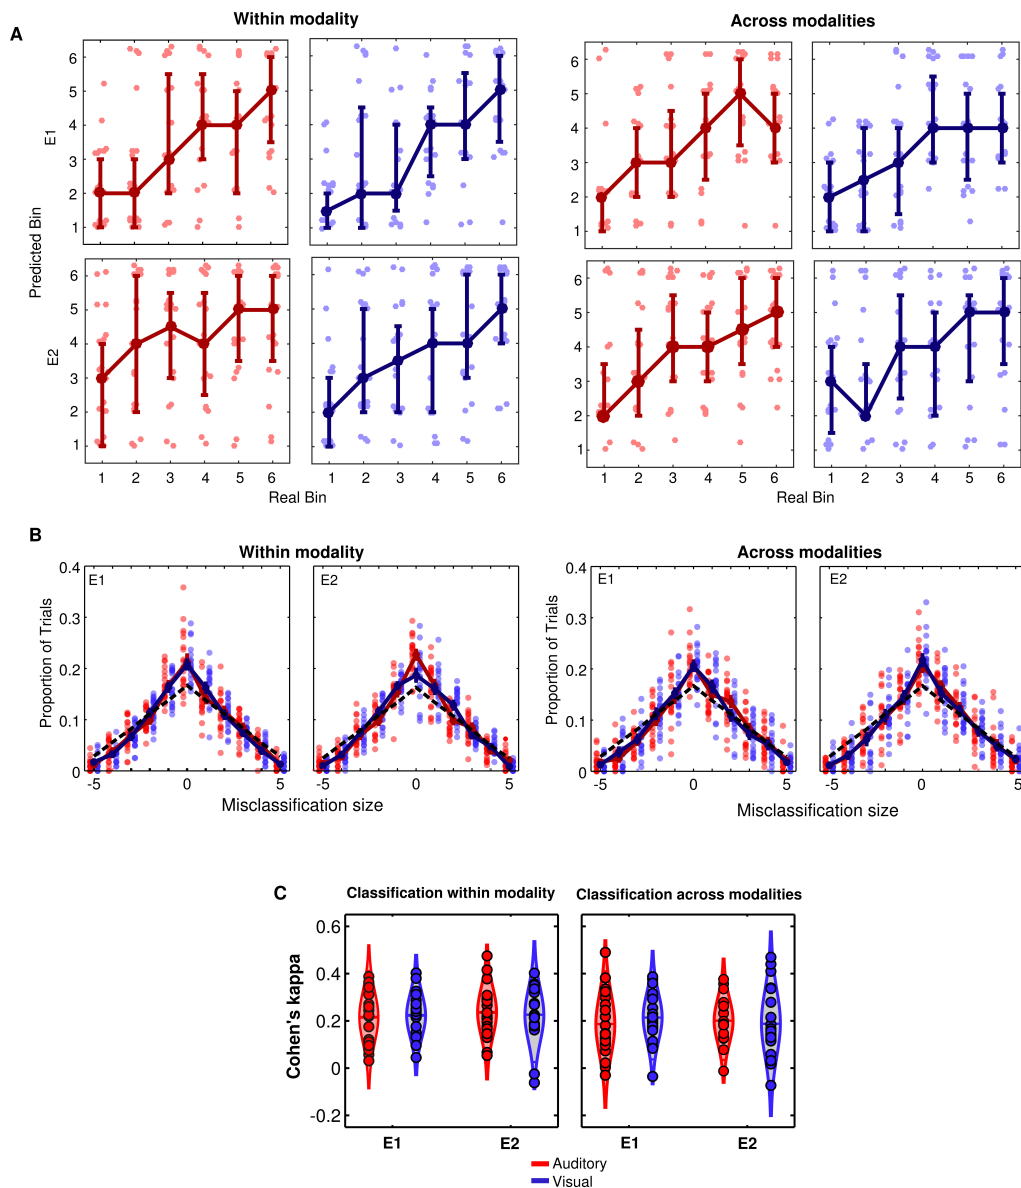

**Figure 5.** MVPA performance for interval classification within and between sensory modalities. (A) Observed versus predicted intervals by the Naive Bayes classifier across exposures and modalities. Each circle shows, for each participant and tested bin, the most common output of the classifier (mode). The continuous line shows the median across participants and error bars show the lower quartile (25th percentile) and upper quartile (75th percentile) across participants. (B) Classification performance of the Naive Bayes classifier when trained within the same sensory modality (upper panels) or between sensory modalities (lower panels). Each plot shows the proportion of trials in which the classifier was able to decode the interval correctly (when the error in the x-axis equals zero) and the proportion of trials in which different levels of errors were observed. The black dashed line represents the expected pattern of errors if the classifier were at chance levels. Left/right panels show accuracy for the first/second exposure (E1/E2) in each trial. Error bars and continuous lines show mean error (mean  $\pm$  s.e.m.) across participants. Each circle shows data from one participant. (C) Agreement between decoded and real interval indexed by Cohen's kappa. The left panel shows classification performance when test trials were of the same modality as the training trials while right panels show performance when the test trials were of a different modality than the training trials. Violin plots show the probability density across participants; line markers represent the median. Circles inside the violin plots show data from each participant.

270 of modality to be predicted ( $F_{1,19} = 0.131, p = .721, \omega^2 = 0$ ) or of exposure ( $F_{1,19} = 0.013, p = .909, \omega^2 = 0$ ). None of  
271 the interactions were significant (modality to be predicted\*exposure:  $F_{1,19} = 1.814, p = .194, \omega^2 = 0.037$ ; modality to be  
272 predicted\*trained modality:  $F_{1,19} = 0.132, p = .721, \omega^2 = 0$ ; trained modality\*exposure:  $F_{1,19} = 0.224, p = .642, \omega^2 = 0$ ;  
273 trained modality\*exposure\*modality to be predicted:  $F_{1,19} = 0.114, p = .739, \omega^2 = 0$ ).

### 274 ***Decoded interval and behavioural performance***

275 We further investigated whether the pattern of EEG activity during the encoding of intervals was associated with the  
276 reproduced interval. Specifically, we tested if trials in which activity during encoding was more similar to intervals that were  
277 shorter/longer than its real duration were followed by systematic under/overestimation of the reproduced interval.

278 Similarly to our previous analysis, the activity of the end of each interval (-125ms to 0 relative to S2) was used. For each  
279 test trial, the Naive Bayes classifier was trained exclusively in intervals that were physically longer or shorter than the interval  
280 presented in that trial. The output of the classifier for each trial can be thought of as a forced judgement of whether, in a given  
281 trial, the EEG activity is more similar to intervals longer or shorter than that interval. Because each interval was presented twice  
282 during encoding (E1 and E2), this procedure was performed for each presentation separately. Based on the classifier outputs,  
283 trials were classified into three categories: (S/S) when in both exposures (E1 and E2) the trial was classified as shorter, (S/L  
284 or L/S) when in one of the two exposures the trial was classified as longer, and (L/L) when in both exposures the trials were  
285 classified as longer.

286 To test whether these categories were correlated with performance, we focused on the residuals of the linear regression  
287 between presented and reproduced interval. These residuals reflect fluctuations in the reproduced interval that were above or  
288 below participants' mean reproduced interval for that given duration. Residual behaviour for each participant was separated  
289 according to the three categories and submitted to a repeated measures ANOVA with category (S/S; S/L or L/S; L/L),  
290 modality (auditory or visual) and trained modality (within or across) as factors. There was a main effect of category  
291 ( $F_{1,19} = 7.231, p = .003, \omega^2 = .233$ ). A post-hoc analysis showed a linear trend between predicted category and residual  
292 behaviour ( $F_{1,19} = 10.898, p = .004$ ), suggesting an association between whether the interval was classified as shorter or longer  
293 and the reproduced interval (Figure 6). The other main effects were not significant (modality:  $F_{1,19} = 0.018, p = 0.893, \omega^2 = 0$ ;  
294 trained modality:  $F_{1,19} = 0.204, p = 0.657, \omega^2 = 0$ ), nor the interactions (category\*modality:  $F_{1,19} = 0.373, p = 0.691, \omega^2 = 0$ ;  
295 category\*trained modality:  $F_{1,19} = 0.183, p = 0.777, \omega^2 = 0$ ; trained modality\*modality:  $F_{1,19} = 0.066, p = 0.799, \omega^2 = 0$ ;  
296 category\*trained modality\*modality:  $F_{1,19} = 0.104, p = 0.857, \omega^2 = 0$ ).

## 297 **Discussion**

298 In this study, we investigated whether there is a common representation of time for auditory and visual modalities. The  
299 behavioural results showed that, although performance was better for auditory intervals than for visual intervals, there was  
300 a strong correlation in performance across participants. The electrophysiological findings showed that activity elicited by

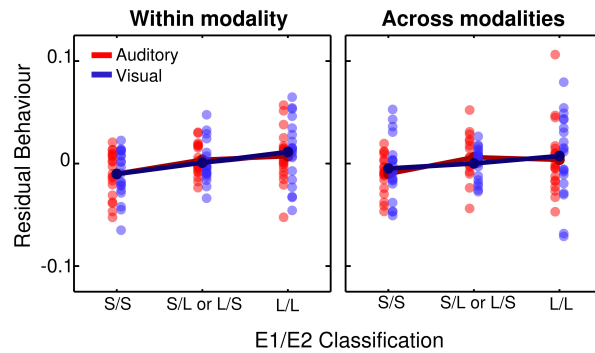

**Figure 6.** Correlation between MVPA classification and performance. Both panels show the residual reproduced interval as a function of test trials being classified as short in both E1 and E2 (S/S); as short in one of the exposures and as long in the other (S/L or L/S) or as long in both E1 and E2 (L/L). Each circle shows data from one participant and continuous lines show mean residual across participants. The left panel shows results when the test data were classified based on trials of the same modality. The right panel shows results from when the test data were classified based on trials of a different modality.

301 intervals was consistent shortly after its onset when of the same modality, and later when of different modalities. Finally, a  
302 classifier based on multivariate activity across electrodes was able to decode temporal intervals within and between modalities  
303 and was correlated with behavioural performance.

304 Our behavioural results are in agreement with the general finding that temporal acuity is better for auditory than for visual  
305 intervals (Merchant et al., 2008b,a; van Wassenhove, 2009). Differences in performance between sensory modalities have  
306 usually been considered as evidence for distributed temporal processing. On the other hand, and also in agreement with previous  
307 behavioural findings, we found a strong correlation in performance between modalities (Merchant et al., 2008b,a; Stauffer  
308 et al., 2012). In our specific experiment, one could argue that the behavioural correlations between performances in different  
309 modalities are being driven by the motor task and not by a common encoding of time across modalities. However, given that  
310 performance differed between auditory and visual intervals, it seems unlikely that the observed correlations are due exclusively  
311 to the motor output of the task. Moreover, previous behavioural studies that found correlations across different modalities and  
312 tasks have used a wide variety of tasks, including purely perceptual judgements (Merchant et al., 2008b,a; Stauffer et al., 2012).  
313 Thus, our results suggest that the encoding of these intervals might be taking place in a common representation across visual  
314 and auditory modalities. Nevertheless, it would be interesting for future studies to address whether this common representation  
315 of time is also task-dependent.

316 Associations in performance across modalities and temporal tasks have been used as evidence for the hypothesis that  
317 different modalities share a central mechanism for temporal processing (Merchant et al., 2013a). An influential view is that,  
318 while temporal processing of short intervals (on the scale of a few hundred milliseconds) can be mediated by perceptual  
319 mechanisms, longer intervals (on the scale of seconds and minutes) might depend on later, cognition-based mechanisms (Lewis  
320 and Miall, 2003; Rammsayer et al., 2015; Stauffer et al., 2012). In the specific case of different sensory modalities, it has been  
321 suggested, based on behavioural findings, that temporal processing goes through a gradual transition of a modality-specific  
322 to a cognitive amodal timing mechanism (Rammsayer et al., 2015; Stauffer et al., 2012). We provide electrophysiological

323 evidence that is consistent with this view. In our findings, the pattern of electrophysiological activity was consistent for the  
324 early moments when comparing intervals of the same modality. For intervals of different modalities, there was also a consistent  
325 pattern of activity that emerged later in the interval. While the existence of a hard boundary between a local, modality-specific,  
326 and a shared representation of time is unlikely (Buonomano et al., 2009), our results are in agreement with recent findings that  
327 suggest that this transition might take place in the range of hundreds of milliseconds (Buonomano et al., 2009; Karmarkar and  
328 Buonomano, 2007; Merchant et al., 2013a) and not in the range of seconds as has previously been suggested. Although we  
329 found a common representation of time in later intervals, this finding does not necessarily suggest that temporal processing is  
330 not going on in modal regions. Rather, modality-specific timing information could be processed locally and passed to common  
331 shared regions.

332 The transition of a local sensory-dependent pattern of activity to a commonly shared representation of time is consistent  
333 with hybrid models of temporal processing, in which there is a transition between sensory encoding of timing information and a  
334 later representation of time in the motor system to control behaviour (Merchant et al., 2013a; Merchant and Yarrow, 2016;  
335 Wiener et al., 2011). Based on neuroimaging and invasive electrophysiological recordings in non-human animals, it has been  
336 proposed that this higher core-timing network depends on structures of the cortico-thalamic-basal ganglia circuit (Buhusi and  
337 Meck, 2005; Coull et al., 2011; Merchant et al., 2013a), such as the supplementary motor area (SMA) (Merchant et al., 2013a,  
338 2015). Recent studies have suggested that in several of these regions time is encoded by means of a population code (Bakurin  
339 et al., 2016; Crowe et al., 2014; Gouvêa et al., 2015; Merchant et al., 2013b; Matell et al., 2011). As previously mentioned, how  
340 this population code is translated to different EEG signals is a topic of discussion. However, here we show that multivariate  
341 decoding analysis might overcome these limitations and reveal important properties of temporal processing. In our results, a  
342 multivariate classifier was able to decode the elapsed interval when it was marked by the same or by a different modality as the  
343 training data. This results suggests that, at least for this late period, the representation of time is qualitatively similar in different  
344 sensory modalities.

345 In a previous study, we have already shown that using multivariate pattern analysis on the EEG signal can reveal activity  
346 related to temporal processing (Bueno et al., 2017). However, in that experiment, MVPA was applied while participants  
347 performed a temporal categorisation task in which they had to judge whether a certain duration was shorter, equal or longer  
348 than a reference. Thus, it was possible that the pattern analysis was picking up activity related to decisional processing or to  
349 particular strategies adopted by the participants (Bueno et al., 2017). Similarly, a study that also investigated whether the pattern  
350 of EEG activity during temporal judgements was consistent across vision and audition focused its analysis during the interval to  
351 be judged (N'Diaye et al., 2004). Here, on the other hand, the classifier was trained during the encoding of an interval that had  
352 to be reproduced later, reducing the possibility of a motor or decisional contamination of the signal. Nevertheless, the pattern of  
353 activity during the encoding was correlated with the reproduced interval, suggesting, once again, that this activity is related to  
354 temporal processing.

355 Taken together, our results suggest that, while there are differences in the processing of intervals marked by auditory and

356 visual stimuli, they also share a common late neural representation. In addition, they show how the analysis of multivariate  
357 patterns can bring about important advances in our understanding of temporal processing.

## 358 **Acknowledgements**

359 This work was supported by the Fundação de Amparo à Pesquisa do Estado de São Paulo (FAPESP) research grants 13/24889-7  
360 and 14/08389-7 and by Conselho Nacional de Pesquisa (CNPq) research grant 122942/2014-0. The authors would like to thank  
361 Nicholas E. Myers and the members of the Timing and Cognition Laboratory at UFABC (<http://neuro.ufabc.edu.br/timing/>) for  
362 useful discussions and suggestions on earlier versions of this manuscript.

## References

- 363
- 364 Bakhurin, K. I., Goudar, V., Shobe, J. L., Claar, L. D., Buonomano, D. V., and Masmanidis, S. C. (2016). Differential encoding  
365 of time by prefrontal and striatal network dynamics. *Journal of Neuroscience*, pages 1789–1816.
- 366 Brainard, D. H. (1997). The psychophysics toolbox. *Spatial Vision*, 10:433–436.
- 367 Bueno, F. D., Morita, V. C., De Camargo, R. Y., Reyes, M. B., Caetano, M. S., and Cravo, A. M. (2017). Dynamic representation  
368 of time in brain states. *Scientific Reports*, 7.
- 369 Bueti, D. and Buonomano, D. V. (2014). Temporal perceptual learning. *Timing & Time Perception*, 2(3):261–289.
- 370 Buhusi, C. V. and Meck, W. H. (2005). What makes us tick? functional and neural mechanisms of interval timing. *Nature*  
371 *Reviews Neuroscience*, 6(10):755–765.
- 372 Buonomano, D. V., Bramen, J., and Khodadadifar, M. (2009). Influence of the interstimulus interval on temporal processing  
373 and learning: testing the state-dependent network model. *Philosophical Transactions of the Royal Society of London B:*  
374 *Biological Sciences*, 364(1525):1865–1873.
- 375 Cicchini, G. M., Arrighi, R., Cecchetti, L., Giusti, M., and Burr, D. C. (2012). Optimal encoding of interval timing in expert  
376 percussionists. *Journal of Neuroscience*, 32(3):1056–1060.
- 377 Cohen, J. (1968). Weighted kappa: Nominal scale agreement provision for scaled disagreement or partial credit. *Psychological*  
378 *Bulletin*, 70(4):213.
- 379 Coull, J. T., Cheng, R.-K., and Meck, W. H. (2011). Neuroanatomical and neurochemical substrates of timing. *Neuropsy-*  
380 *chopharmacology*, 36(1):3–25.
- 381 Crowe, D. A., Zarco, W., Bartolo, R., and Merchant, H. (2014). Dynamic representation of the temporal and sequential structure  
382 of rhythmic movements in the primate medial premotor cortex. *Journal of Neuroscience*, 34(36):11972–11983.
- 383 García-Garibay, O., Cadena-Valencia, J., Merchant, H., and de Lafuente, V. (2016). Monkeys share the human ability to  
384 internally maintain a temporal rhythm. *Frontiers in psychology*, 7:1971.
- 385 Getty, D. J. (1975). Discrimination of short temporal intervals: A comparison of two models. *Perception & Psychophysics*,  
386 18(1):1–8.
- 387 Gouvêa, T. S., Monteiro, T., Motiwala, A., Soares, S., Machens, C., and Paton, J. J. (2015). Striatal dynamics explain duration  
388 judgments. *Elife*, 4:e11386.
- 389 Grootswagers, T., Wardle, S. G., and Carlson, T. A. (2017). Decoding dynamic brain patterns from evoked responses: A tutorial  
390 on multivariate pattern analysis applied to time series neuroimaging data. *Journal of Cognitive Neuroscience*.
- 391 Ivry, R. B. and Hazeltine, R. E. (1995). Perception and production of temporal intervals across a range of durations: evidence  
392 for a common timing mechanism. *Journal of Experimental Psychology: Human Perception and Performance*, 21(1):3.
- 393 Ivry, R. B. and Schlerf, J. E. (2008). Dedicated and intrinsic models of time perception. *Trends in Cognitive Sciences*,  
394 12(7):273–280.
- 395 JASP Team, T. (2017). JASP (Version 0.8.1.2)[Computer software].

- 396 Jazayeri, M. and Shadlen, M. N. (2010). Temporal context calibrates interval timing. *Nature Neuroscience*, 13(8):1020–1026.
- 397 Karmarkar, U. R. and Buonomano, D. V. (2007). Timing in the absence of clocks: encoding time in neural network states.  
398 *Neuron*, 53(3):427–438.
- 399 Keele, S. W., Pokorny, R. A., Corcos, D. M., and Ivry, R. (1985). Do perception and motor production share common timing  
400 mechanisms: A correlational analysis. *Acta Psychologica*, 60(2):173–191.
- 401 Kononowicz, T. W., Van Rijn, H., and Meck, W. H. (2016). Timing and time perception: A critical review of neural timing  
402 signatures before, during, and after the to-be-timed interval. *Sensation, Perception and Attention*, 2:1–35.
- 403 Lejeune, H. and Wearden, J. H. (2009). Vierordt’s the experimental study of the time sense (1868) and its legacy. *European*  
404 *Journal of Cognitive Psychology*, 21(6):941–960.
- 405 Lemm, S., Blankertz, B., Dickhaus, T., and Müller, K.-R. (2011). Introduction to machine learning for brain imaging.  
406 *Neuroimage*, 56(2):387–399.
- 407 Lewis, P. A. and Miall, R. C. (2003). Distinct systems for automatic and cognitively controlled time measurement: evidence  
408 from neuroimaging. *Current Opinion in Neurobiology*, 13(2):250 – 255.
- 409 Maris, E. and Oostenveld, R. (2007). Nonparametric statistical testing of eeg-and meg-data. *Journal of Neuroscience Methods*,  
410 164(1):177–190.
- 411 Matell, M. S., Shea-Brown, E., Gooch, C., Wilson, A. G., and Rinzel, J. (2011). A heterogeneous population code for elapsed  
412 time in rat medial agranular cortex. *Behavioral Neuroscience*, 125(1):54.
- 413 Mauk, M. D. and Buonomano, D. V. (2004). The neural basis of temporal processing. *Annual Review of Neuroscience*,  
414 27:307–340.
- 415 Merchant, H., Harrington, D. L., and Meck, W. H. (2013a). Neural basis of the perception and estimation of time. *Annual*  
416 *Review of Neuroscience*, 36:313–336.
- 417 Merchant, H., Pérez, O., Bartolo, R., Méndez, J. C., Mendoza, G., Gámez, J., Yc, K., and Prado, L. (2015). Sensorimotor neural  
418 dynamics during isochronous tapping in the medial premotor cortex of the macaque. *European Journal of Neuroscience*,  
419 41(5):586–602.
- 420 Merchant, H., Pérez, O., Zarco, W., and Gámez, J. (2013b). Interval tuning in the primate medial premotor cortex as a general  
421 timing mechanism. *Journal of Neuroscience*, 33(21):9082–9096.
- 422 Merchant, H. and Yarrow, K. (2016). How the motor system both encodes and influences our sense of time. *Current Opinion in*  
423 *Behavioral Sciences*, 8:22–27.
- 424 Merchant, H., Zarco, W., Bartolo, R., and Prado, L. (2008a). The context of temporal processing is represented in the  
425 multidimensional relationships between timing tasks. *PLoS One*, 3(9):e3169.
- 426 Merchant, H., Zarco, W., and Prado, L. (2008b). Do we have a common mechanism for measuring time in the hundreds of  
427 millisecond range? evidence from multiple-interval timing tasks. *Journal of Neurophysiology*, 99(2):939–949.
- 428 N’Diaye, K., Ragot, R., Garnero, L., and Pouthas, V. (2004). What is common to brain activity evoked by the perception of



- 429 visual and auditory filled durations? a study with meg and eeg co-recordings. *Cognitive Brain Research*, 21(2):250–268.
- 430 Pérez, O. and Merchant, H. (2018). The synaptic properties of cells define the hallmarks of interval timing in a recurrent neural  
431 network. *Journal of Neuroscience*, pages 2651–17.
- 432 Rammsayer, T. H., Borter, N., and Troche, S. J. (2015). Visual-auditory differences in duration discrimination of intervals in  
433 the subsecond and second range. *Frontiers in Psychology*, 6.
- 434 Stauffer, C. C., Haldemann, J., Troche, S. J., and Rammsayer, T. H. (2012). Auditory and visual temporal sensitivity: Evidence  
435 for a hierarchical structure of modality-specific and modality-independent levels of temporal information processing.  
436 *Psychological Research*, 76(1):20–31.
- 437 van Wassenhove, V. (2009). Minding time in an amodal representational space. *Philosophical Transactions of the Royal Society  
438 of London B: Biological Sciences*, 364(1525):1815–1830.
- 439 Wiener, M., Matell, M. S., and Coslett, H. B. (2011). Multiple mechanisms for temporal processing. *Frontiers in Integrative  
440 Neuroscience*, 5(July):31.
- 441 Wolff, M. J., Ding, J., Myers, N. E., and Stokes, M. G. (2015). Revealing hidden states in visual working memory using  
442 electroencephalography. *Frontiers in Systems Neuroscience*, 9:123.
